# Supplementary material for: Understanding the g-tensors of perchlorotriphenylmethyl and Finland-type trityl radicals
Source: Royal Society of Chemistry journal article supplement (doi:10.1039/d0cp03626a), 2020-01-01

Supplementary Information

## Understanding the *g*-tensors of Perchlorotriphenylmethyl and Finland-type Trityl radicals

Paul Demay-Drouhard,<sup>a,1,†</sup> H. Y. Vincent Ching,<sup>b,2,†</sup> Christophe Decroos,<sup>c</sup> Régis Guillot,<sup>d</sup> Yun Li,<sup>e</sup> Leandro C. Tabares,<sup>b</sup> Clotilde Policar,<sup>a\*</sup> Helene C. Bertrand,<sup>a\*</sup> and Sun Un<sup>b\*</sup>

<sup>a</sup>Laboratoire des Biomolécules, LBM, Département de Chimie, Ecole Normale Supérieure, PSL University, Sorbonne Université, CNRS, 75005 Paris, France.

<sup>b</sup>Institute for Integrative Biology of the Cell, Department of Biochemistry, Biophysics and Structural Biology, Université Paris-Saclay, CEA, CNRS UMR 9198, Gif-sur-Yvette, F-91198, France.

<sup>c</sup>Aix Marseille Univ, CNRS, Centrale Marseille, iSm2, Marseille, France.

<sup>d</sup>Institut de Chimie Moléculaire et des Matériaux d'Orsay, Université Paris-Sud, CNRS UMR 8182, Université Paris-Saclay, 91405 Orsay, France.

<sup>e</sup>Laboratoire de Chimie des Processus Biologiques, CNRS UMR 8229, Collège de France, UPMC Univ Paris 06, 11 Place Marcelin Berthelot, 75231 Paris Cedex 05, France.

<sup>1</sup>Current address: Department of Chemistry, York University, 4700 Keele Street, Toronto, Ontario M3J 1P3, Canada.

<sup>2</sup>Current address: BIMEF – Department of Chemistry, and ELCAT – Faculty of Applied Engineering, University of Antwerp, Universiteitsplein1, B-2610 Antwerp, Belgium.

<sup>†</sup>These authors contributed equally.

\* Authors to whom correspondence should be addressed: [sun.un@cea.fr](mailto:sun.un@cea.fr), [helene.bertrand@ens.psl.eu](mailto:helene.bertrand@ens.psl.eu), [clotilde.policar@ens.psl.eu](mailto:clotilde.policar@ens.psl.eu)

**1 – Synthesis**

**2 – Comparison between X-ray crystallography and DFT calculations**

**3 – Final optimized DFT structures and calculated g-tensors**

**4 – Full size reproduction of Figure 4**



**Scheme S1.** Synthesis of PTMTE and H<sub>3</sub>PTMTC.

## **2 – Comparison between X-ray crystallography and DFT calculations**

A comparison of selected bond lengths and blade angles from DFT calculations and X-ray structures (when available) of PTM and TAM radicals is provided in Table S2. The molecular structures of the PTM radicals as optimized by DFT calculations were in excellent agreement with the X-ray crystallographic structural determinations that have been reported in the literature. As the crystal structures of FT and H<sub>3</sub>FT have not been reported, we have included instead the values for Me<sub>3</sub>FT in Table S2 for comparison. The molecular structure of H<sub>3</sub>FT from the calculations was also an excellent match for the core of the crystal structure of Me<sub>3</sub>FT. Interestingly, the blade angles of the aromatic rings were able to be reproduced, with those of the PTM radicals being consistently more twisted from the central plane than the TAM radicals.

**Table S2.** Comparison of selected bond lengths and blade angles from DFT calculations and X-ray structures (when available) of PTM and TAM radicals discussed in this work.

| Mean bond length (Å)                                      | PTMTC |                    | H <sub>3</sub> PTMTC |                    | FT     | H <sub>3</sub> FT | Me <sub>3</sub> FT |
|-----------------------------------------------------------|-------|--------------------|----------------------|--------------------|--------|-------------------|--------------------|
|                                                           | DFT   | X-ray <sup>a</sup> | DFT                  | X-ray <sup>b</sup> | DFT    | DFT               | X-ray <sup>d</sup> |
| C <sub>central</sub> -C <sub>1</sub>                      | 1.479 | 1.473              | 1.481                | 1.473              | 1.474  | 1.473             | 1.449              |
| C <sub>1</sub> -C <sub>2,6</sub>                          | 1.419 | 1.405              | 1.419                | 1.407              | 1.4223 | 1.422             | 1.417              |
| C <sub>2,6</sub> -C <sub>3,5</sub>                        | 1.399 | 1.380              | 1.401                | 1.395              | 1.405  | 1.406             | 1.395              |
| C <sub>3,5</sub> -C <sub>4</sub>                          | 1.398 | 1.379              | 1.397                | 1.396              | 1.406  | 1.414             | 1.407              |
| C <sub>2,6</sub> -Cl/S                                    | 1.749 | 1.728              | 1.741                | 1.724              | 1.780  | 1.776             | 1.758              |
| C <sub>3,5</sub> -Cl/S                                    | 1.755 | 1.728              | 1.742                | 1.718              | 1.784  | 1.777             | 1.767              |
| C <sub>4</sub> -C <sub>COOR</sub>                         | 1.542 | 1.520              | 1.510                | 1.502              | 1.524  | 1.480             | 1.480              |
| C=O                                                       | 1.255 | 1.223              | 1.208                | 1.237              | 1.263  | 1.219             | 1.207              |
| C-O                                                       |       |                    | 1.346                | 1.288              |        | 1.355             | 1.335              |
| Mean blade angle (°)                                      | 49.28 | 48.3               | 49.48                | 49.37              | 46.0   | 45.6              | 44.16              |
| Mean C <sub>4</sub> -C <sub>COOR</sub> dihedral angle (°) | 89.35 | 84.0               | 89.14                | 86.91              | 30.4   | 22.9              | 17.77              |

<sup>a</sup>from *CrystEngComm* **2004**, *6*, 573–578, <sup>b</sup>from *Chem. Eur. J.* **2007**, *13*, 8153–8163, <sup>c</sup>calculation performed on the methyl ester derivative, and <sup>d</sup>from *J. Org. Chem.* **2008**, *73*, 1490–1497.

### 3 – Final optimized DFT structures and calculated g-tensors

#### A - FT

|    |    |           |           |           |
|----|----|-----------|-----------|-----------|
| 1  | 6  | 3.630527  | 0.429146  | 3.096547  |
| 2  | 16 | 4.810059  | -0.504689 | 2.003207  |
| 3  | 6  | 3.551903  | -1.084437 | 0.879178  |
| 4  | 6  | 2.350039  | -0.356075 | 0.859886  |
| 5  | 16 | 2.277538  | 1.028436  | 1.977427  |
| 6  | 6  | 1.271869  | -0.727504 | 0.009718  |
| 7  | 6  | 1.482708  | -1.854854 | -0.832998 |
| 8  | 6  | 2.689009  | -2.575101 | -0.805767 |
| 9  | 6  | 3.739553  | -2.205928 | 0.052226  |
| 10 | 16 | 2.801982  | -3.969555 | -1.913619 |
| 11 | 6  | 1.48035   | -3.359638 | -3.070007 |
| 12 | 16 | 0.273076  | -2.432718 | -2.007645 |
| 13 | 6  | 0.000016  | 0.013317  | -0.000051 |
| 14 | 6  | -1.272945 | -0.725581 | -0.009774 |
| 15 | 6  | -1.485556 | -1.852459 | 0.833146  |
| 16 | 6  | -2.69295  | -2.57087  | 0.80601   |
| 17 | 6  | -3.742891 | -2.200255 | -0.052116 |
| 18 | 6  | -3.553505 | -1.079183 | -0.879215 |
| 19 | 6  | -2.350537 | -0.352642 | -0.860018 |
| 20 | 16 | -2.80813  | -3.964887 | 1.914185  |
| 21 | 6  | -1.485571 | -3.356756 | 3.07047   |
| 22 | 16 | -0.276856 | -2.431931 | 2.007964  |
| 23 | 16 | -2.27596  | 1.031575  | -1.977803 |
| 24 | 6  | -3.629804 | 0.434111  | -3.096818 |
| 25 | 16 | -4.810792 | -0.497662 | -2.003283 |
| 26 | 6  | 5.041089  | -2.997115 | 0.086095  |
| 27 | 8  | 6.089057  | -2.347644 | 0.361166  |
| 28 | 6  | -5.045664 | -2.98938  | -0.085925 |
| 29 | 8  | -4.962706 | -4.224969 | 0.16233   |
| 30 | 6  | -0.778543 | -4.557164 | 3.708609  |
| 31 | 6  | -2.082731 | -2.432785 | 4.139495  |
| 32 | 6  | -4.34719  | 1.642175  | -3.708234 |
| 33 | 6  | -3.064009 | -0.484204 | -4.187518 |
| 34 | 6  | 0.77147   | -4.559091 | -3.707877 |
| 35 | 6  | 2.078874  | -2.4368   | -4.139236 |
| 36 | 6  | 3.063347  | -0.488035 | 4.187465  |
| 37 | 6  | 4.349755  | 1.636264  | 3.707657  |
| 38 | 6  | 0.001146  | 1.490226  | -0.000087 |
| 39 | 6  | 0.786914  | 2.235527  | -0.920911 |
| 40 | 6  | 0.771181  | 3.64114   | -0.929482 |
| 41 | 6  | 0.003333  | 4.366086  | -0.000124 |
| 42 | 6  | -0.765583 | 3.642339  | 0.929283  |
| 43 | 6  | -0.783463 | 2.236756  | 0.920741  |

|    |    |           |           |           |
|----|----|-----------|-----------|-----------|
| 44 | 16 | 1.710369  | 4.434742  | -2.219997 |
| 45 | 6  | 2.751512  | 2.944705  | -2.620186 |
| 46 | 16 | 1.693916  | 1.469402  | -2.243519 |
| 47 | 16 | -1.703549 | 4.437409  | 2.219787  |
| 48 | 6  | -2.746943 | 2.948972  | 2.620035  |
| 49 | 16 | -1.691616 | 1.472037  | 2.243363  |
| 50 | 6  | 0.004457  | 5.889476  | -0.000175 |
| 51 | 8  | 0.208465  | 6.453488  | -1.111642 |
| 52 | 6  | 4.023397  | 2.925347  | -1.762038 |
| 53 | 6  | 3.093661  | 2.954582  | -4.11426  |
| 54 | 6  | -4.018876 | 2.931526  | 1.761917  |
| 55 | 6  | -3.089033 | 2.959389  | 4.114119  |
| 56 | 8  | 4.956146  | -4.232596 | -0.161991 |
| 57 | 8  | -0.198723 | 6.453861  | 1.111257  |
| 58 | 8  | -6.092595 | -2.338279 | -0.361125 |
| 59 | 1  | 2.355419  | 0.065098  | 4.814579  |
| 60 | 1  | 2.54407   | -1.34749  | 3.755531  |
| 61 | 1  | 3.876508  | -0.856774 | 4.822612  |
| 62 | 1  | 3.659525  | 2.207778  | 4.337187  |
| 63 | 1  | 5.172408  | 1.295524  | 4.345393  |
| 64 | 1  | 4.753722  | 2.298583  | 2.938461  |
| 65 | 1  | 1.482449  | -5.134305 | -4.310503 |
| 66 | 1  | 0.33704   | -5.219142 | -2.953481 |
| 67 | 1  | -0.02509  | -4.215817 | -4.376515 |
| 68 | 1  | 2.804278  | -2.990918 | -4.745357 |
| 69 | 1  | 1.288281  | -2.061859 | -4.798649 |
| 70 | 1  | 2.587428  | -1.580768 | -3.688199 |
| 71 | 1  | -2.809011 | -2.98568  | 4.745683  |
| 72 | 1  | -1.291606 | -2.058917 | 4.798882  |
| 73 | 1  | -2.589965 | -1.57607  | 3.688267  |
| 74 | 1  | -1.490401 | -5.131156 | 4.311362  |
| 75 | 1  | -0.345123 | -5.218045 | 2.954358  |
| 76 | 1  | 0.01855   | -4.214969 | 4.377167  |
| 77 | 1  | -3.877732 | -0.851908 | -4.822545 |
| 78 | 1  | -2.355295 | 0.06773   | -4.8148   |
| 79 | 1  | -2.545971 | -1.344306 | -3.755381 |
| 80 | 1  | -5.170393 | 1.302535  | -4.345843 |
| 81 | 1  | -4.750102 | 2.305331  | -2.939204 |
| 82 | 1  | -3.656098 | 2.212446  | -4.337946 |
| 83 | 1  | -4.619585 | 3.823703  | 1.971195  |
| 84 | 1  | -3.780977 | 2.915775  | 0.695089  |
| 85 | 1  | -4.618736 | 2.04484   | 1.995383  |
| 86 | 1  | -3.68772  | 3.845065  | 4.351973  |
| 87 | 1  | -3.687136 | 2.078735  | 4.370868  |
| 88 | 1  | -2.190049 | 2.967478  | 4.734611  |
| 89 | 1  | 3.693747  | 3.839317  | -4.352092 |
| 90 | 1  | 3.690391  | 2.072992  | -4.370993 |
| 91 | 1  | 2.194715  | 2.964081  | -4.734788 |

|    |   |          |          |           |
|----|---|----------|----------|-----------|
| 92 | 1 | 4.625413 | 3.816651 | -1.971271 |
| 93 | 1 | 3.785458 | 2.909884 | -0.695214 |
| 94 | 1 | 4.621956 | 2.03779  | -1.995535 |

g value of the free electron [g\_e]: 0.20023193D+01

relativistic mass correction [g\_RMC]: -0.16308623D-03

diamagnetic correction to g tensor [g\_DC]:

XX= 0.54730466D-04 YX=-0.54975364D-07 ZX=-0.87553638D-04

XY=-0.49583337D-07 YY=-0.14902175D-04 ZY= 0.88925985D-07

XZ= 0.79756642D-04 YZ=-0.59037939D-07 ZZ= 0.12455007D-05

orbital Zeeman and spin-orbit coupling contribution to g tensor [g\_OZ/SOC]:

XX= 0.57117772D-03 YX= 0.42787727D-06 ZX=-0.30424271D-03

XY= 0.68968763D-06 YY= 0.10545503D-02 ZY= 0.43861297D-06

XZ=-0.47395591D-03 YZ= 0.32825424D-06 ZZ= 0.43424304D-03

g tensor [g = g\_e + g\_RMC + g\_DC + g\_OZ/SOC]:

XX= 0.20027821D+01 YX= 0.37290191D-06 ZX=-0.39179635D-03

XY= 0.64010429D-06 YY= 0.20031959D+01 ZY= 0.52753895D-06

XZ=-0.39419927D-03 YZ= 0.26921630D-06 ZZ= 0.20025917D+01

g shifts relative to the free electron (ppm):

xx= -36.8 yy= 772.0 zz= 876.6



## B – H<sub>3</sub>FT

|    |    |          |          |          |
|----|----|----------|----------|----------|
| 1  | 16 | 1.595148 | 1.56571  | -2.23117 |
| 2  | 6  | 0.641524 | 2.277956 | -0.91511 |
| 3  | 6  | 0.54275  | 3.68139  | -0.92293 |
| 4  | 16 | 1.47989  | 4.510517 | -2.18722 |
| 5  | 6  | 2.606745 | 3.082216 | -2.55617 |
| 6  | 6  | -0.09623 | 1.484021 | 0.004147 |
| 7  | 6  | -0.92864 | 2.162994 | 0.932728 |
| 8  | 6  | -1.01369 | 3.566626 | 0.949493 |
| 9  | 6  | -0.28961 | 4.340372 | 0.01326  |
| 10 | 16 | -2.01433 | 4.273664 | 2.233761 |
| 11 | 6  | -2.94335 | 2.710675 | 2.62145  |
| 12 | 16 | -1.76898 | 1.326608 | 2.251053 |
| 13 | 6  | 0.000329 | 0.010154 | -0.00273 |
| 14 | 6  | 1.317995 | -0.64515 | 0.005984 |
| 15 | 6  | 1.591714 | -1.76095 | -0.83459 |
| 16 | 6  | 2.837652 | -2.41142 | -0.81129 |
| 17 | 6  | 3.858761 | -1.96321 | 0.058512 |
| 18 | 6  | 3.613692 | -0.84061 | 0.880462 |
| 19 | 6  | 2.366996 | -0.19162 | 0.851679 |
| 20 | 16 | 3.020893 | -3.77284 | -1.94388 |
| 21 | 6  | 1.661403 | -3.23818 | -3.08631 |
| 22 | 16 | 0.411749 | -2.40337 | -2.00077 |
| 23 | 16 | 2.20428  | 1.19817  | 1.945337 |
| 24 | 6  | 3.586822 | 0.703649 | 3.077132 |
| 25 | 16 | 4.821346 | -0.16918 | 1.99805  |
| 26 | 6  | 5.19169  | -2.60572 | 0.12924  |
| 27 | 8  | 6.21168  | -2.03337 | 0.482518 |
| 28 | 6  | 1.025347 | -4.47827 | -3.72362 |
| 29 | 6  | 2.195206 | -2.27175 | -4.15008 |
| 30 | 6  | 4.232814 | 1.963773 | 3.662447 |
| 31 | 6  | 3.078071 | -0.23028 | 4.181589 |
| 32 | 6  | -0.42232 | 5.814571 | 0.077017 |
| 33 | 8  | -0.14082 | 6.440893 | -1.083   |
| 34 | 6  | -4.20195 | 2.602415 | 1.752075 |
| 35 | 6  | -3.29051 | 2.694591 | 4.114145 |
| 36 | 6  | 3.842189 | 3.119823 | -1.64897 |
| 37 | 6  | 2.996715 | 3.123262 | -4.03772 |
| 38 | 6  | -1.22471 | -0.80618 | -0.01259 |
| 39 | 6  | -2.32293 | -0.484   | -0.85825 |
| 40 | 6  | -3.48747 | -1.27098 | -0.88404 |
| 41 | 6  | -3.59919 | -2.40564 | -0.04671 |
| 42 | 6  | -2.52074 | -2.73735 | 0.803424 |
| 43 | 6  | -1.35652 | -1.9495  | 0.822706 |
| 44 | 16 | -2.31327 | 0.908003 | -1.96361 |
| 45 | 6  | -3.60483 | 0.237905 | -3.11078 |
| 46 | 16 | -4.74504 | -0.75269 | -2.03366 |

|    |    |          |          |          |
|----|----|----------|----------|----------|
| 47 | 16 | -2.53867 | -4.13636 | 1.898366 |
| 48 | 6  | -1.23376 | -3.47401 | 3.040968 |
| 49 | 16 | -0.10247 | -2.46548 | 1.972097 |
| 50 | 6  | -2.97112 | -0.64755 | -4.18994 |
| 51 | 6  | -4.38345 | 1.404182 | -3.72857 |
| 52 | 6  | -4.79513 | -3.27965 | -0.0335  |
| 53 | 8  | -4.78268 | -4.45508 | 0.299298 |
| 54 | 6  | -0.44843 | -4.6465  | 3.638303 |
| 55 | 6  | -1.86514 | -2.60618 | 4.136226 |
| 56 | 8  | -5.93177 | -2.65387 | -0.40176 |
| 57 | 8  | 5.185373 | -3.91044 | -0.211   |
| 58 | 8  | -0.77419 | 6.428641 | 1.073234 |
| 59 | 1  | -2.28467 | -0.05353 | -4.80277 |
| 60 | 1  | -2.41106 | -1.47579 | -3.74914 |
| 61 | 1  | -3.75185 | -1.05997 | -4.8383  |
| 62 | 1  | -3.71382 | 2.016553 | -4.34116 |
| 63 | 1  | -5.1724  | 1.020728 | -4.38393 |
| 64 | 1  | -4.83791 | 2.037084 | -2.96322 |
| 65 | 1  | -1.11408 | -5.26969 | 4.244624 |
| 66 | 1  | 0.003656 | -5.26663 | 2.861219 |
| 67 | 1  | 0.342741 | -4.27199 | 4.296117 |
| 68 | 1  | -2.55106 | -3.21052 | 4.739909 |
| 69 | 1  | -1.08494 | -2.20391 | 4.791332 |
| 70 | 1  | -2.42345 | -1.76896 | 3.709976 |
| 71 | 1  | 2.951576 | -2.77403 | -4.76298 |
| 72 | 1  | 1.377575 | -1.94548 | -4.80181 |
| 73 | 1  | 2.647935 | -1.38739 | -3.69515 |
| 74 | 1  | 1.763541 | -5.00082 | -4.34094 |
| 75 | 1  | 0.644202 | -5.16919 | -2.9686  |
| 76 | 1  | 0.19991  | -4.18006 | -4.37823 |
| 77 | 1  | 3.912291 | -0.53733 | 4.821838 |
| 78 | 1  | 2.336656 | 0.289324 | 4.798024 |
| 79 | 1  | 2.612378 | -1.12621 | 3.76366  |
| 80 | 1  | 5.073258 | 1.68599  | 4.307053 |
| 81 | 1  | 4.5965   | 2.632225 | 2.878961 |
| 82 | 1  | 3.507786 | 2.504539 | 4.279515 |
| 83 | 1  | 4.405099 | 4.042493 | -1.82745 |
| 84 | 1  | 3.565023 | 3.078819 | -0.5928  |
| 85 | 1  | 4.492106 | 2.26608  | -1.86849 |
| 86 | 1  | 3.565136 | 4.035064 | -4.24801 |
| 87 | 1  | 3.640651 | 2.270831 | -4.27719 |
| 88 | 1  | 2.119539 | 3.097228 | -4.68787 |
| 89 | 1  | -3.9567  | 3.531056 | 4.349659 |
| 90 | 1  | -3.8205  | 1.770157 | 4.365741 |
| 91 | 1  | -2.39704 | 2.770485 | 4.737668 |
| 92 | 1  | -4.86822 | 3.447233 | 1.95811  |
| 93 | 1  | -3.95478 | 2.605877 | 0.687588 |
| 94 | 1  | -4.73532 | 1.673332 | 1.980151 |

|    |   |          |          |          |
|----|---|----------|----------|----------|
| 95 | 1 | 6.101766 | -4.23727 | -0.18077 |
| 96 | 1 | -6.6505  | -3.31025 | -0.40938 |
| 97 | 1 | -0.21298 | 7.400379 | -0.93571 |

g value of the free electron [g\_e]: 0.20023193D+01

relativistic mass correction [g\_RMC]:-0.16347915D-03

diamagnetic correction to g tensor [g\_DC]:

XX= 0.41082783D-04 YX= 0.14546571D-04 ZX=-0.11924377D-03

XY= 0.16745123D-04 YY=-0.47093066D-04 ZY=-0.82578940D-05

XZ= 0.10930791D-03 YZ= 0.10827694D-04 ZZ= 0.23392070D-04

orbital Zeeman and spin-orbit coupling contribution to g tensor [g\_OZ/SOC]:

XX= 0.61974153D-03 YX=-0.58570480D-04 ZX=-0.11833771D-03

XY=-0.13796902D-04 YY= 0.13138458D-02 ZY= 0.40259604D-04

XZ=-0.64979994D-03 YZ=-0.10621632D-03 ZZ= 0.12418271D-02

g tensor [g = g\_e + g\_RMC + g\_DC + g\_OZ/SOC]:

XX= 0.20028166D+01 YX=-0.44023909D-04 ZX=-0.23758147D-03

XY= 0.29482207D-05 YY= 0.20034226D+01 ZY= 0.32001710D-04

XZ=-0.54049203D-03 YZ=-0.95388628D-04 ZZ= 0.20034210D+01

g shifts relative to the free electron (ppm):

xx= 305.6 yy= 1102.6 zz= 1294.2

## C – PTMTC

|    |    |          |          |          |
|----|----|----------|----------|----------|
| 1  | 6  | 0.536171 | 2.302923 | 0.910245 |
| 2  | 6  | 0.794367 | 1.246874 | -0.00208 |
| 3  | 6  | 1.861817 | 1.454149 | -0.9142  |
| 4  | 6  | 2.618366 | 2.631043 | -0.89964 |
| 5  | 6  | 2.344058 | 3.667315 | -0.00212 |
| 6  | 6  | 1.288482 | 3.48245  | 0.895794 |
| 7  | 6  | -0.00198 | 0.000269 | -0.00093 |
| 8  | 6  | -1.47985 | 0.066097 | -0.00053 |
| 9  | 6  | -2.26386 | -0.68418 | 0.914098 |
| 10 | 6  | -3.66157 | -0.62449 | 0.899787 |
| 11 | 6  | -4.35067 | 0.193363 | -0.00065 |
| 12 | 6  | -3.59179 | 0.947539 | -0.90065 |
| 13 | 6  | -2.19428 | 0.883029 | -0.91503 |
| 14 | 17 | -1.48633 | -1.63215 | 2.161087 |
| 15 | 17 | -4.59949 | -1.56546 | 2.04655  |
| 16 | 6  | -5.89125 | 0.261574 | -0.00053 |
| 17 | 8  | -6.46645 | -0.57528 | -0.73804 |
| 18 | 17 | -4.44248 | 1.969872 | -2.04581 |
| 19 | 17 | -1.3356  | 1.759423 | -2.16112 |
| 20 | 17 | 2.192937 | 0.269861 | -2.15762 |
| 21 | 17 | 3.933113 | 2.852163 | -2.04095 |
| 22 | 6  | 3.176117 | 4.965925 | -0.00168 |
| 23 | 8  | 4.189932 | 4.954559 | 0.737974 |
| 24 | 17 | 0.941372 | 4.767484 | 2.039605 |
| 25 | 17 | -0.67621 | 2.107782 | 2.155401 |
| 26 | 6  | 0.679853 | -1.31253 | 0.000842 |
| 27 | 6  | 0.328692 | -2.3414  | -0.91128 |
| 28 | 6  | 0.973312 | -3.58314 | -0.89681 |
| 29 | 6  | 2.008295 | -3.86098 | 0.001214 |
| 30 | 6  | 2.372398 | -2.85371 | 0.899773 |
| 31 | 6  | 1.723568 | -1.61427 | 0.913949 |
| 32 | 17 | -0.86251 | -2.039   | -2.15533 |
| 33 | 17 | 2.157177 | -0.46467 | 2.158451 |
| 34 | 17 | 3.660067 | -3.1913  | 2.043441 |
| 35 | 6  | 2.721917 | -5.22814 | 0.000805 |
| 36 | 8  | 3.734218 | -5.30607 | -0.73696 |
| 37 | 17 | 0.51298  | -4.83292 | -2.03975 |
| 38 | 8  | 2.741884 | 5.88325  | -0.73992 |
| 39 | 8  | -6.39017 | 1.145105 | 0.737956 |
| 40 | 8  | 2.207028 | -6.10367 | 0.737819 |

g value of the free electron [g\_e]: 0.20023193D+01

relativistic mass correction [g\_RMC]: -0.17116759D-03

diamagnetic correction to g tensor [g\_DC]:

XX= 0.49422686D-04 YX=-0.28164798D-07 ZX=-0.95618067D-08

XY=-0.58524774D-07 YY= 0.49034845D-04 ZY= 0.29245435D-06

XZ=-0.69329489D-06 YZ=-0.83187127D-06 ZZ= 0.14325631D-04  
 orbital Zeeman and spin-orbit coupling contribution to g tensor [g\_OZ/SOC]:  
 XX=-0.70739929D-03 YX= 0.57219596D-05 ZX=-0.57616206D-05  
 XY=-0.36615073D-05 YY=-0.71620186D-03 ZY= 0.20925243D-04  
 XZ=-0.13337173D-05 YZ=-0.18809685D-06 ZZ= 0.22633103D-02  
 g tensor [g = g\_e + g\_RMC + g\_DC + g\_OZ/SOC]:  
 XX= 0.20014902D+01 YX= 0.56937948D-05 ZX=-0.57711824D-05  
 XY=-0.37200321D-05 YY= 0.20014810D+01 ZY= 0.21217697D-04  
 XZ=-0.20270122D-05 YZ=-0.10199681D-05 ZZ= 0.20044258D+01  
 g shifts relative to the free electron (ppm):  
 xx= -838.5 yy= -829.0 zz= 2106.5

## D – H<sub>3</sub>PTMTC

|    |    |          |          |          |
|----|----|----------|----------|----------|
| 1  | 6  | 2.357042 | 0.052578 | 0.93268  |
| 2  | 6  | 1.413236 | -0.46369 | 0.007866 |
| 3  | 6  | 1.879107 | -1.43576 | -0.91457 |
| 4  | 6  | 3.209434 | -1.87212 | -0.90114 |
| 5  | 6  | 4.121103 | -1.34297 | 0.01552  |
| 6  | 6  | 3.690431 | -0.37474 | 0.92556  |
| 7  | 6  | 0.004003 | -0.00722 | 0.004752 |
| 8  | 6  | -0.30341 | 1.442406 | 0.008133 |
| 9  | 6  | 0.308602 | 2.330633 | -0.913   |
| 10 | 6  | 0.024873 | 3.70155  | -0.89899 |
| 11 | 6  | -0.88841 | 4.228239 | 0.01753  |
| 12 | 6  | -1.51525 | 3.372029 | 0.925913 |
| 13 | 6  | -1.22277 | 2.002706 | 0.931554 |
| 14 | 6  | -1.09738 | -0.99724 | -0.00395 |
| 15 | 6  | -1.12472 | -2.08334 | 0.908826 |
| 16 | 6  | -2.16247 | -3.02319 | 0.889608 |
| 17 | 6  | -3.21334 | -2.9024  | -0.02276 |
| 18 | 6  | -3.21685 | -1.83427 | -0.92281 |
| 19 | 6  | -2.17273 | -0.90147 | -0.92471 |
| 20 | 17 | 0.086048 | -2.22327 | 2.152261 |
| 21 | 17 | -2.19452 | -4.35154 | 2.018476 |
| 22 | 6  | -4.31144 | -3.93901 | -0.06486 |
| 23 | 17 | -4.53575 | -1.70943 | -2.05638 |
| 24 | 17 | -2.17691 | 0.330654 | -2.15508 |
| 25 | 17 | 1.359504 | 1.721929 | -2.16083 |
| 26 | 17 | 0.776013 | 4.786634 | -2.03827 |
| 27 | 6  | -1.16133 | 5.713705 | 0.05413  |
| 28 | 17 | -2.64656 | 4.054241 | 2.063623 |
| 29 | 17 | -1.94629 | 1.013116 | 2.16804  |
| 30 | 17 | 3.776646 | -3.06216 | -2.0421  |
| 31 | 6  | 5.545966 | -1.84372 | 0.051066 |
| 32 | 17 | 4.845374 | 0.265408 | 2.063885 |
| 33 | 17 | 1.859083 | 1.166546 | 2.174596 |
| 34 | 17 | 0.828037 | -2.04471 | -2.16201 |

|    |   |          |          |          |
|----|---|----------|----------|----------|
| 35 | 8 | -5.34233 | -3.60143 | 0.721209 |
| 36 | 8 | -4.25266 | -4.94782 | -0.73279 |
| 37 | 1 | -6.02454 | -4.29576 | 0.661501 |
| 38 | 8 | -2.18875 | 6.048779 | -0.73737 |
| 39 | 8 | -0.51906 | 6.494293 | 0.721576 |
| 40 | 1 | -2.32786 | 7.012496 | -0.6824  |
| 41 | 8 | 6.347532 | -1.11409 | -0.73602 |
| 42 | 8 | 5.904689 | -2.79072 | 0.715752 |
| 43 | 1 | 7.253355 | -1.47132 | -0.68155 |

g value of the free electron [g\_e]: 0.20023193D+01  
relativistic mass correction [g\_RMC]: -0.16525305D-03  
diamagnetic correction to g tensor [g\_DC]:

XX= 0.61205447D-04 YX=-0.34554580D-06 ZX= 0.19991741D-05  
XY=-0.35576723D-06 YY= 0.58774461D-04 ZY= 0.36869991D-06  
XZ=-0.41810602D-05 YZ=-0.64064979D-05 ZZ= 0.27893718D-04

orbital Zeeman and spin-orbit coupling contribution to g tensor [g\_OZ/SOC]:

XX=-0.10583233D-02 YX=-0.30431673D-04 ZX= 0.36168479D-04  
XY=-0.11365927D-04 YY=-0.10231297D-02 ZY=-0.23319459D-04  
XZ=-0.13496772D-05 YZ= 0.19798457D-04 ZZ= 0.27942168D-02

g tensor [g = g\_e + g\_RMC + g\_DC + g\_OZ/SOC]:

XX= 0.20011569D+01 YX=-0.30777219D-04 ZX= 0.38167653D-04  
XY=-0.11721695D-04 YY= 0.20011897D+01 ZY=-0.22950759D-04  
XZ=-0.55307374D-05 YZ= 0.13391959D-04 ZZ= 0.20049762D+01

g shifts relative to the free electron (ppm):

xx= -1172.9 yy= -1119.2 zz= 2656.9

## E – PTMTE

|    |    |          |          |          |
|----|----|----------|----------|----------|
| 1  | 6  | -2.11253 | -0.93797 | -0.98321 |
| 2  | 6  | -1.06028 | -1.04162 | -0.03715 |
| 3  | 6  | -1.09993 | -2.14688 | 0.851584 |
| 4  | 6  | -2.12836 | -3.09476 | 0.7874   |
| 5  | 6  | -3.15802 | -2.96637 | -0.14792 |
| 6  | 6  | -3.14665 | -1.8807  | -1.02682 |
| 7  | 6  | 0.02888  | -0.03978 | 0.021515 |
| 8  | 6  | -0.29575 | 1.405665 | 0.049815 |
| 9  | 6  | 0.330357 | 2.322939 | -0.83282 |
| 10 | 6  | 0.031253 | 3.690002 | -0.79316 |
| 11 | 6  | -0.91299 | 4.186477 | 0.10879  |
| 12 | 6  | -1.55423 | 3.300491 | 0.977771 |
| 13 | 6  | -1.24677 | 1.934635 | 0.959766 |
| 14 | 17 | 1.420694 | 1.755611 | -2.06706 |
| 15 | 17 | 0.803425 | 4.81004  | -1.88497 |
| 16 | 6  | -1.20248 | 5.668958 | 0.174861 |
| 17 | 8  | -0.58754 | 6.433699 | 0.889262 |
| 18 | 17 | -2.72618 | 3.942221 | 2.09915  |

|    |    |          |          |          |
|----|----|----------|----------|----------|
| 19 | 17 | -1.99329 | 0.908417 | 2.152709 |
| 20 | 17 | 0.082001 | -2.30173 | 2.12134  |
| 21 | 17 | -2.17573 | -4.44491 | 1.890808 |
| 22 | 6  | -4.24601 | -4.01237 | -0.23701 |
| 23 | 8  | -4.15373 | -5.00991 | -0.9223  |
| 24 | 17 | -4.43651 | -1.74502 | -2.19341 |
| 25 | 17 | -2.09619 | 0.319771 | -2.18816 |
| 26 | 6  | 1.443042 | -0.47989 | 0.0487   |
| 27 | 6  | 2.357792 | 0.024361 | 1.008655 |
| 28 | 6  | 3.696657 | -0.38498 | 1.02222  |
| 29 | 6  | 4.164582 | -1.3214  | 0.097308 |
| 30 | 6  | 3.280732 | -1.83852 | -0.85294 |
| 31 | 6  | 1.944518 | -1.42203 | -0.88596 |
| 32 | 17 | 1.814406 | 1.100141 | 2.26596  |
| 33 | 17 | 0.930292 | -2.01562 | -2.17146 |
| 34 | 17 | 3.891294 | -2.98911 | -2.01309 |
| 35 | 6  | 5.596855 | -1.80257 | 0.151664 |
| 36 | 8  | 5.948737 | -2.76933 | 0.795738 |
| 37 | 17 | 4.814359 | 0.239835 | 2.206583 |
| 38 | 8  | -5.29033 | -3.68883 | 0.525184 |
| 39 | 8  | -2.20049 | 6.003743 | -0.64233 |
| 40 | 8  | 6.39284  | -1.03282 | -0.58989 |
| 41 | 6  | -6.40528 | -4.61947 | 0.5267   |
| 42 | 6  | -2.57435 | 7.406934 | -0.66825 |
| 43 | 6  | 7.799254 | -1.39383 | -0.62162 |
| 44 | 1  | -3.38519 | 7.470231 | -1.39089 |
| 45 | 1  | -2.90977 | 7.718363 | 0.322357 |
| 46 | 1  | -1.72234 | 8.011273 | -0.98379 |
| 47 | 1  | 8.267016 | -0.65219 | -1.26569 |
| 48 | 1  | 8.215031 | -1.35285 | 0.386381 |
| 49 | 1  | 7.914207 | -2.39715 | -1.03507 |
| 50 | 1  | -7.14037 | -4.17902 | 1.19701  |
| 51 | 1  | -6.80737 | -4.71716 | -0.483   |
| 52 | 1  | -6.07474 | -5.59191 | 0.895361 |

g value of the free electron [g\_e]: 0.20023193D+01

relativistic mass correction [g\_RMC]: -0.16528373D-03

diamagnetic correction to g tensor [g\_DC]:

XX= 0.66138682D-04 YX= 0.76238730D-06 ZX= 0.98767409D-06

XY= 0.17263376D-06 YY= 0.64603611D-04 ZY=-0.24290312D-06

XZ=-0.45329369D-04 YZ=-0.43184936D-04 ZZ= 0.32735177D-04

orbital Zeeman and spin-orbit coupling contribution to g tensor [g\_OZ/SOC]:

XX=-0.10219731D-02 YX=-0.23021950D-04 ZX=-0.64997789D-04

XY= 0.76130006D-05 YY=-0.10438627D-02 ZY=-0.11388088D-03

XZ=-0.62579568D-04 YZ=-0.43315998D-04 ZZ= 0.27381980D-02

g tensor [g = g\_e + g\_RMC + g\_DC + g\_OZ/SOC]:

XX= 0.20011982D+01 YX=-0.22259563D-04 ZX=-0.64010115D-04

XY= 0.77856344D-05 YY= 0.20011748D+01 ZY=-0.11412378D-03

XZ=-0.10790894D-03 YZ=-0.86500934D-04 ZZ= 0.20049250D+01  
g shifts relative to the free electron (ppm):  
xx= -1150.5 yy= -1119.8 zz= 2610.3



Full size reproduction of Figure 4

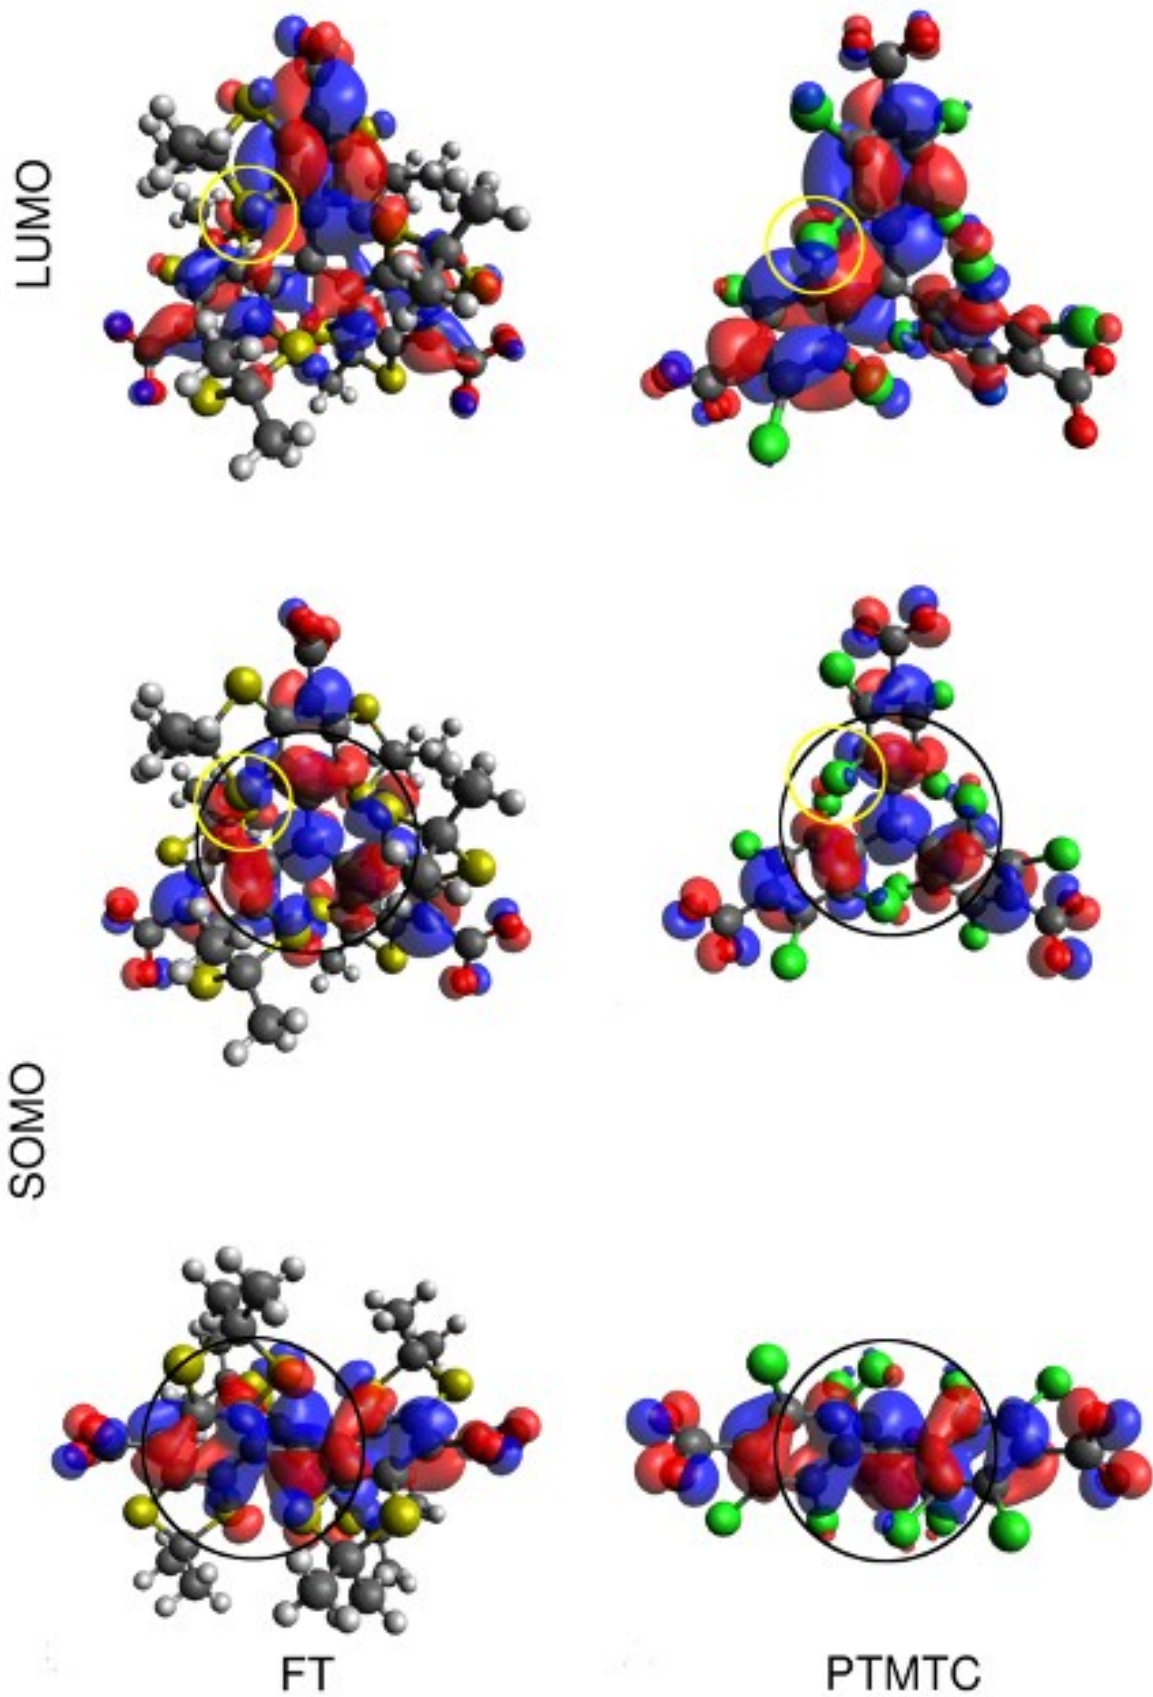

Supplement: d0cp03626a1.pdf [file d0cp03626a1.pdf]
